# Supplementary material for: Fe/Co/N–C/graphene derived from Fe/ZIF-67/graphene oxide three dimensional frameworks as a remarkably efficient and stable catalyst for the oxygen reduction reaction
Source: Royal Society of Chemistry journal article supplement (doi:10.1039/d1ra08817c), 2022-01-01
Supplement: d1ra08817c1.pdf [file d1ra08817c1.pdf]

## *Supplementary Information*

### Fe/Co/N-C/graphene derived from Fe/ZIF-67/graphene oxide three dimensional frameworks as a remarkable efficient and stable catalyst for oxygen reduction reaction

Junchao Xiong,<sup>a,b</sup> Xiaohong Chen,<sup>\*a</sup> Yupan Zhang,<sup>a</sup> Yue Lu,<sup>c</sup> Xundao Liu,<sup>c</sup> Yafei  
Zheng,<sup>a</sup> Yongming Zhang,<sup>a</sup> and Jun Lin<sup>b</sup>

<sup>a</sup> Institute of Advanced Materials, North China Electric Power University, Beijing,  
102206, China

<sup>b</sup> School of New Energy, North China Electric Power University, Beijing, 102206,  
China

<sup>c</sup> School of Materials Science and Engineering, University of Jinan, Jinan, 250022  
China

E-mail: xhchen200905@ncepu.edu.cn

#### **Part 1: Physical Characterization**

The morphology and structure of the ZIF-67, ZIF-67/GO, Fe/ZIF-67, Fe/ZIF-67/GO, Co/N-C, Co/N-C/graphene, Fe/Co/N-C and Fe/Co/N-C/graphene were analyzed by scanning electron microscopy (SEM) (Tescan Mira 3xh) and transmission electron microscopy (TEM) (Jeol JEM2100). The surface characteristics and composition of the ZIF-67, ZIF-67/GO, Fe/ZIF-67, Fe/ZIF-67/GO, Co/N-C, Co/N-

C/graphene, Fe/Co/N-C and Fe/Co/N-C/graphene were determined by X-ray diffraction (XRD) (Smart Lab). The elemental composition of the Co/N-C and Fe/Co/N-C/graphene were investigated by X-ray photoelectron spectroscopy (XPS) (Thermo Scientific Escalab 250XI). The defect degree and graphitization degree of the ZIF-67, ZIF-67/GO, Fe/ZIF-67, Fe/ZIF-67/GO, Co/N-C, Co/N-C/graphene, Fe/Co/N-C and Fe/Co/N-C/graphene were analyzed by Raman spectroscopy (Thermo DXR 2XI). Quadrasorb EVO was used to measure the specific surface area and pore size distribution of the Co/N-C and Fe/Co/N-C/graphene at a temperature of 77.3K, based on the N<sub>2</sub> adsorption-desorption isotherm. The specific surface area and pore size distribution were calculated by Brunauer Emmet-Teller (BET) method and Barrett-Joyner-Halenda (BJH) model.

## **Part 2: Electrocatalytic testing**

The electrocatalytic performance of the catalysts was evaluated using a standard three-electrode system at the Chenhua Electrochemical Workstation in Shanghai. Glass carbon electrode, silver/silver chloride and platinum wire are used as working electrode, reference electrode and counter electrode, respectively. Commercial 20%Pt-C catalyst purchased from Johnson Matthey (UK).

Preparation of catalyst slurry: The collected catalyst samples were ground for about 30 min. Then, 1 mg of the ground catalyst sample was taken and added with 10  $\mu$ L Nafion 117 solution and 200  $\mu$ L water and alcohol dispersant (water: ethanol =4:1). The catalyst slurry was obtained after ultrasonic treatment for about 40 min. Then, the catalyst slurry was dripped onto the working electrode, 4  $\mu$ L each time, dried naturally,

and repeated three times to make the catalyst adhere to the working electrode. The electrochemical experiments were conducted in a 0.1 M KOH aqueous electrolyte. Cyclic Voltammetry (CV) and Linear Sweep Voltammetry (LSV) tests were performed at 10 mV s<sup>-1</sup> scanning rate. The voltage range of CV test was -1 to 0.25 V and the rotating speeds was controlled from 400 rpm to 2000 rpm.

The applied potential vs. Ag/AgCl (3M KCl) was converted to reversible hydrogen electrode (RHE) potential using the following equation:

$$E_{\text{RHE}} = E_{\text{Ag/AgCl}} + 0.059\text{pH} + E^{\circ}_{\text{Ag/AgCl}}$$

where  $E_{\text{Ag/AgCl}}$  is the experimentally measured potential using Ag/AgCl as the reference electrode and  $E^{\circ}_{\text{Ag/AgCl}}$  is 0.210 V.

The electron transfer number can be calculated by Koutecky- Levich (K-L) equations:

$$\frac{1}{J} = \frac{1}{J_L} + \frac{1}{J_K} = \frac{1}{B\omega^{1/2}} + \frac{1}{J_K}$$

$$B = 0.62nFD_0^{2/3}C_0\nu^{-1/6}$$

$$J_K = nFkC_0$$

where  $J$  is the measured current density,  $J_K$  and  $J_L$  are the kinetic- and diffusion limiting current densities,  $\omega$  is the angular velocity of the rotating electrode,  $F$  is the Faraday constant ( $F = 96485 \text{ C mol}^{-1}$ ),  $C_0$  is the concentration of O<sub>2</sub> in 0.1 M KOH ( $1.2 \times 10^{-3} \text{ M}$ ),  $D_0$  is the diffusion coefficient of O<sub>2</sub> in 0.1 M KOH ( $1.9 \times 10^{-5} \text{ cm}^2 \text{ s}^{-1}$ ),  $\nu$  is the kinematic viscosity of the electrolyte ( $0.01 \text{ cm}^2 \text{ s}^{-1}$ ), and  $k$  is the electron transfer rate constant.

Tafel slopes were calculated according to the Tafel equation:

$$\eta = b \log(j) + a$$

where  $\eta$ ,  $j$  and  $b$  are the over potential, measured current density, and Tafel slope, respectively. Moreover, rotating ring-disk electrode (RRDE) of the catalyst was performed at 1600 rpm in 0.1 M KOH medium, the values of  $n$  and  $H_2O_2$  yields could be determined according to the following equations:

$$H_2O_2\% = 100 \times \frac{2 I_r/n}{I_d + I_r/N}$$

$$n = \frac{4I_d}{I_d + I_r/N}$$

where  $I_d$  and  $I_r$  are disk current and ring current, respectively,  $N$  is the  $H_2O_2$  collection efficiency at the ring.

The turnover frequency (TOF) was calculated using the following equation:

$$TOF = \frac{I}{4NF}$$

where  $I$  is the value of limiting current density at 1600 rpm  $\text{min}^{-1}$ ,  $N$  is the number of catalytic active sites, and  $F$  is Faraday constant.

### Part 3: Figures

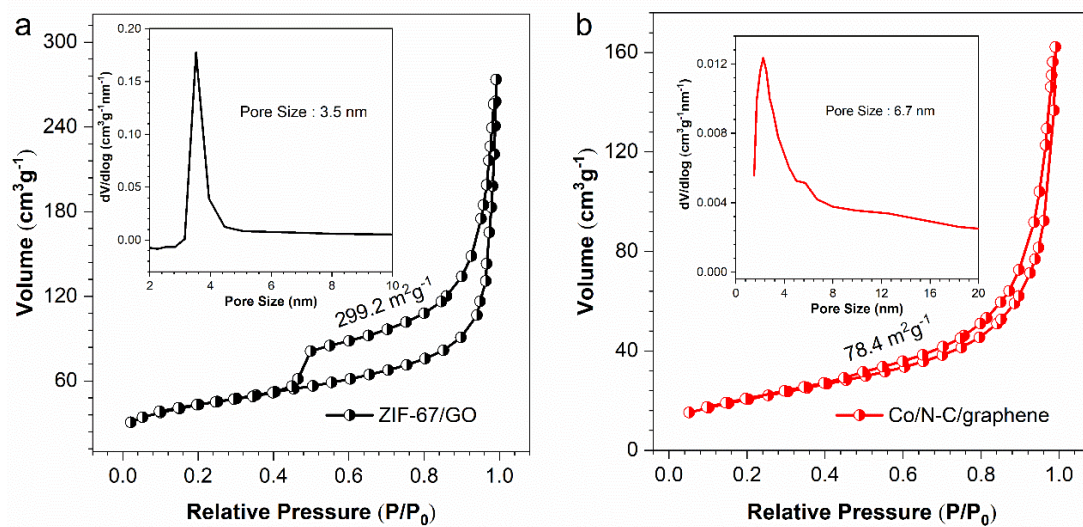

**Fig. S1**  $N_2$  adsorption/desorption isotherms (insert: pore size distribution) of ZIF-67/GO and Co/N-C/graphene composites.

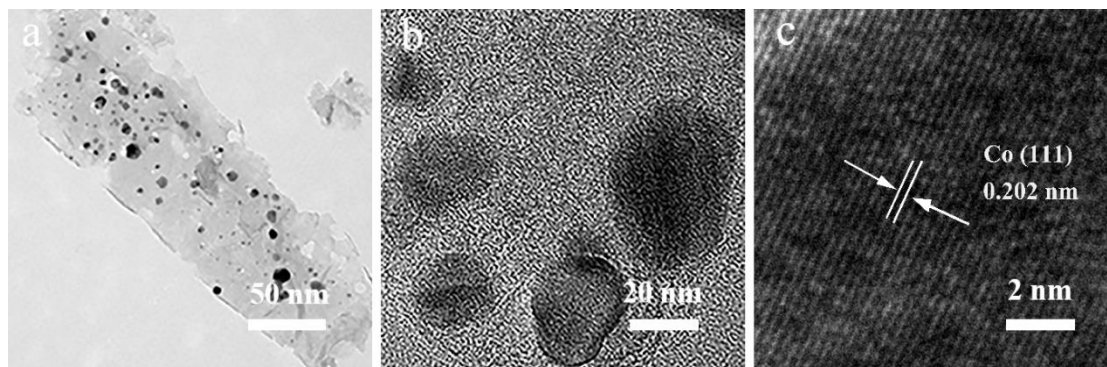

**Fig. S2** (a) TEM and (b, c) HRTEM image of Co/N-C composites.

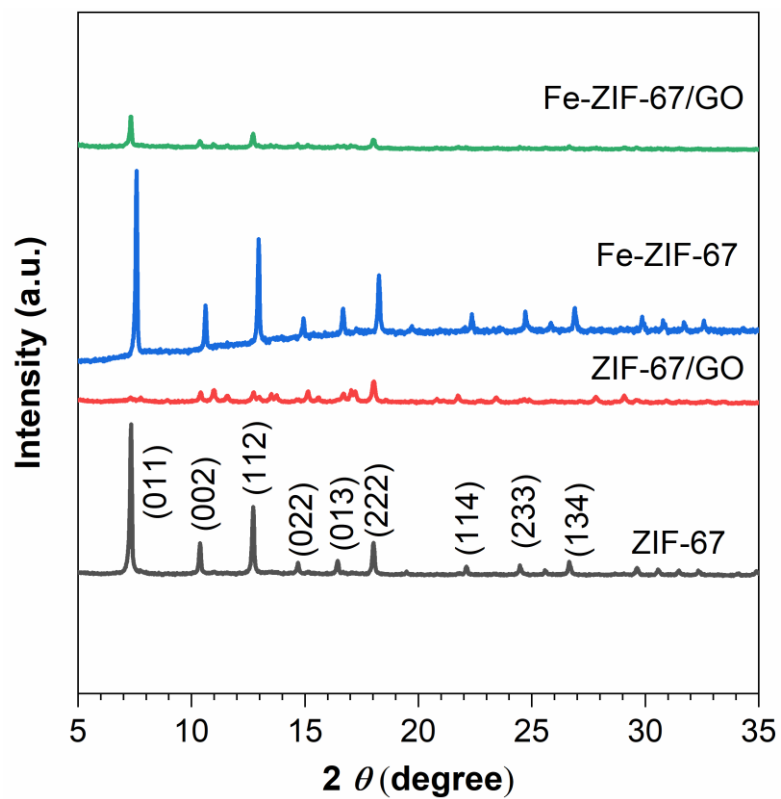

**Fig. S3** XRD patterns of ZIF-67, ZIF-67/GO, Fe-ZIF-67 and Fe-ZIF67/GO composites.

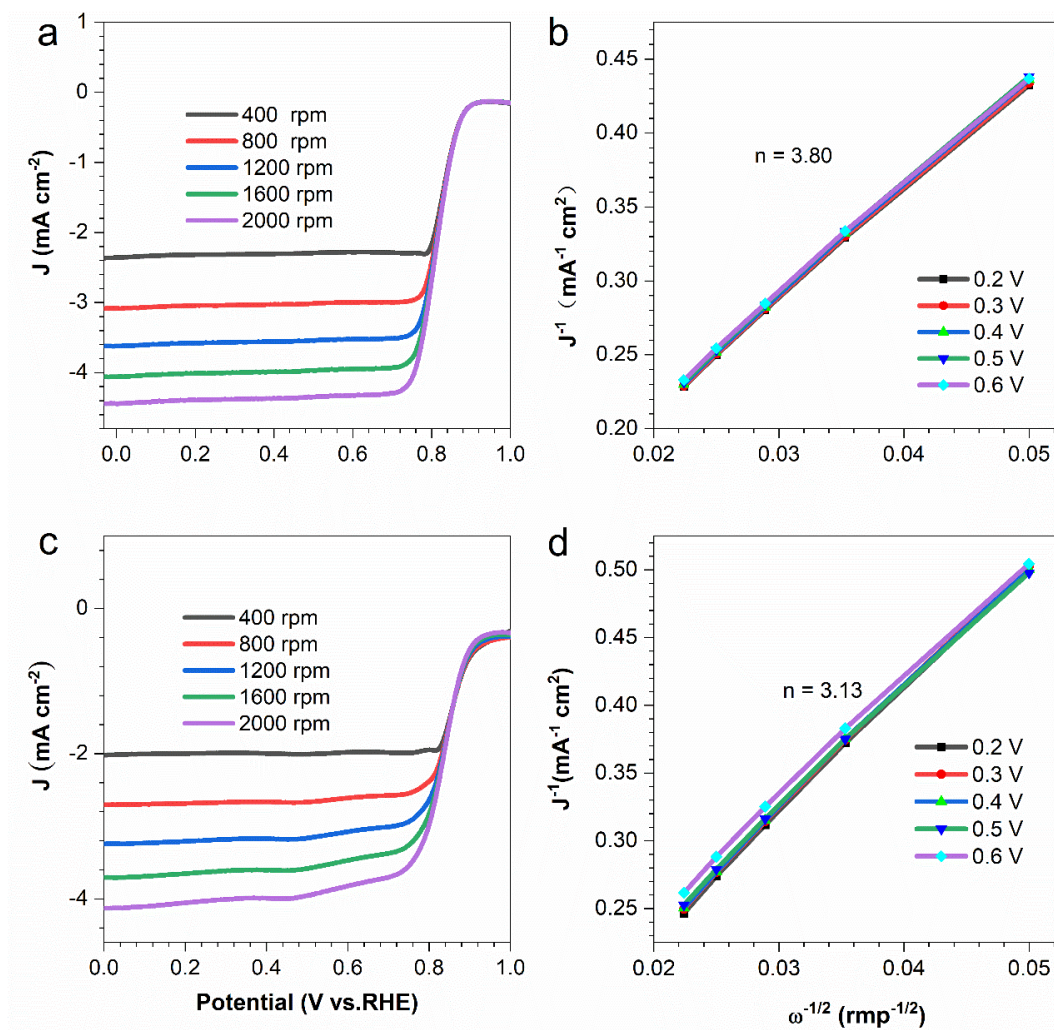

**Fig. S4** LSV curves and K-L plots of (a, b) Co/N-C/ and (c, d) Fe/Co/N-C composites.

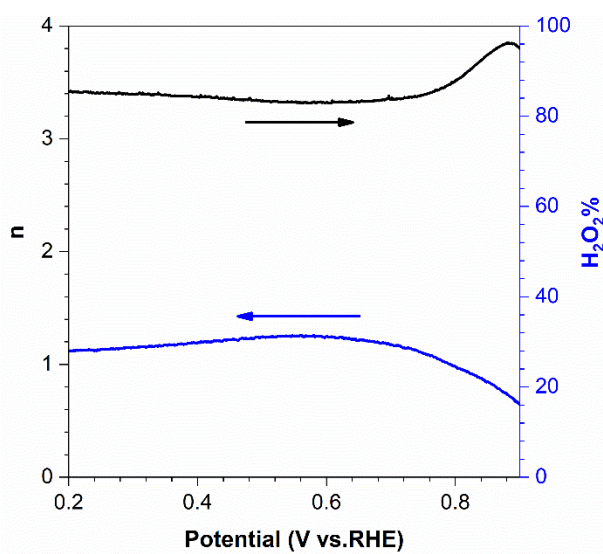

**Fig. S5** Electronic transfer number and H<sub>2</sub>O<sub>2</sub> yield curves of Co/N-C on a RRDE at 1600 rpm during ORR.

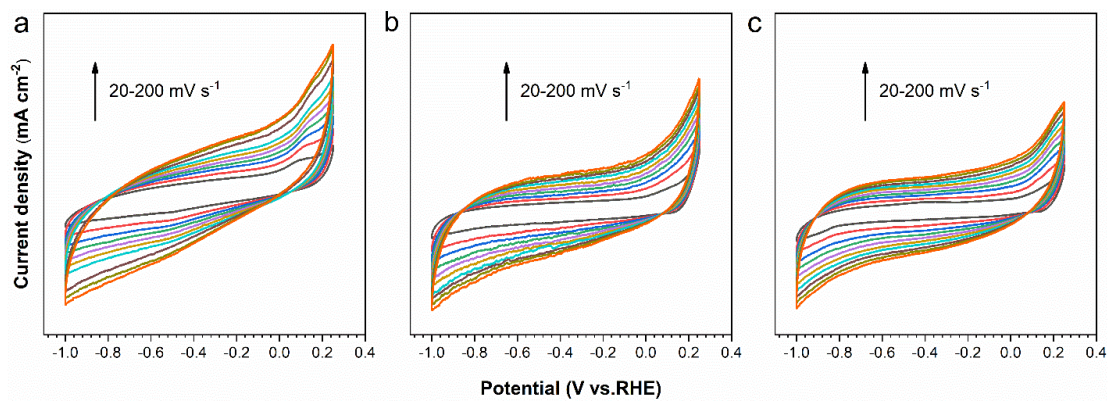

**Fig. S6** Non-faradic CVs of (a) Co/N-C, (b) Co/N-C/graphene and (c) Fe/Co/N-C at various scan rates.
